# Supplementary material
Source: Royal Society of Chemistry journal article supplement (doi:10.1039/d6bm00008h)
Supplement: d6bm00008h1.pdf [file d6bm00008h1.pdf]

# Supporting Information

## Graphene Oxide-Chitosan Nanocomposites for Phenethyl Isothiocyanate Delivery in Glioma

Jayaseema Dasan Mary,<sup>a</sup> Yu-Wen Chen,<sup>b</sup> Christu Rajan Yesudoss,<sup>a</sup> Ming-Huang Lin,<sup>a</sup> Chia-Huei Lin,<sup>a</sup> Selvanayagam Mariadoss,<sup>c</sup> Hsien- Ming Lee \*<sup>d</sup> and Dennis W. Hwang \*<sup>a,b</sup>

<sup>a</sup> Institute of Biomedical Sciences, Academia Sinica, Taipei 115, Taiwan

<sup>b</sup> Biomedical Translation Research Center, Academia Sinica, Taipei 115, Taiwan.

<sup>c</sup> Department of Advanced Zoology and Biotechnology, Loyola Institute of Frontier Energy (LIFE),  
Loyola College, India

<sup>d</sup> Institute of Chemistry, Academia Sinica, Taipei 115, Taiwan

\*Corresponding Authors: Hsien- Ming Lee and Dennis W. Hwang

Hsien- Ming Lee

E-mail: leehm@chem.sinica.edu.tw

ORCID: 0000-0003-2250-8385

Dennis W. Hwang

E-mail: dwhwang@ibms.sinica.edu.tw

ORCID: 0000-0001-9974-4728

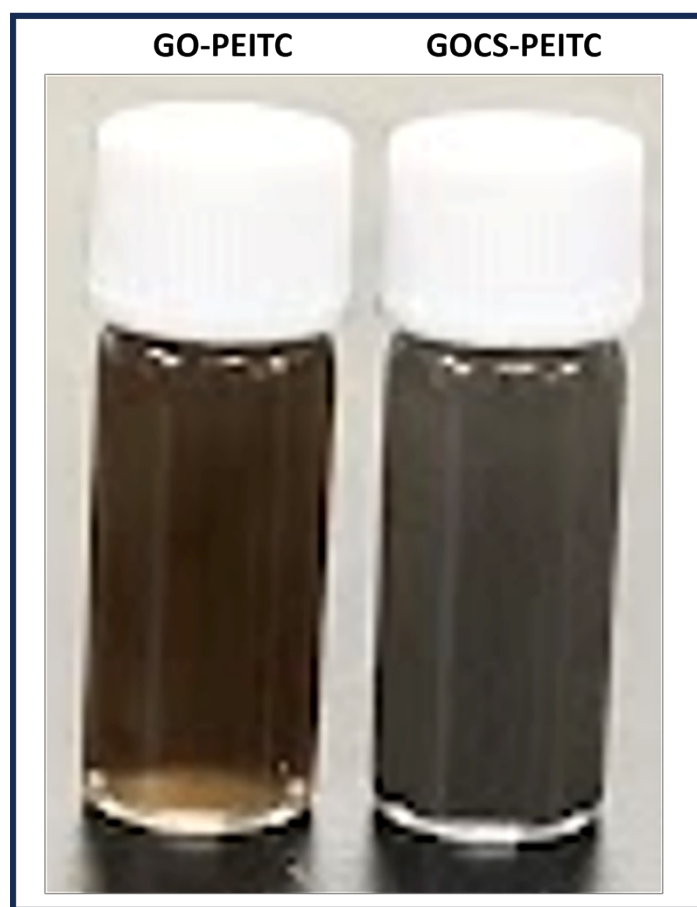

**Fig.S1** Digital photographs of the synthesized GO-PEITC and GOCS-PEITC nanocomposites.

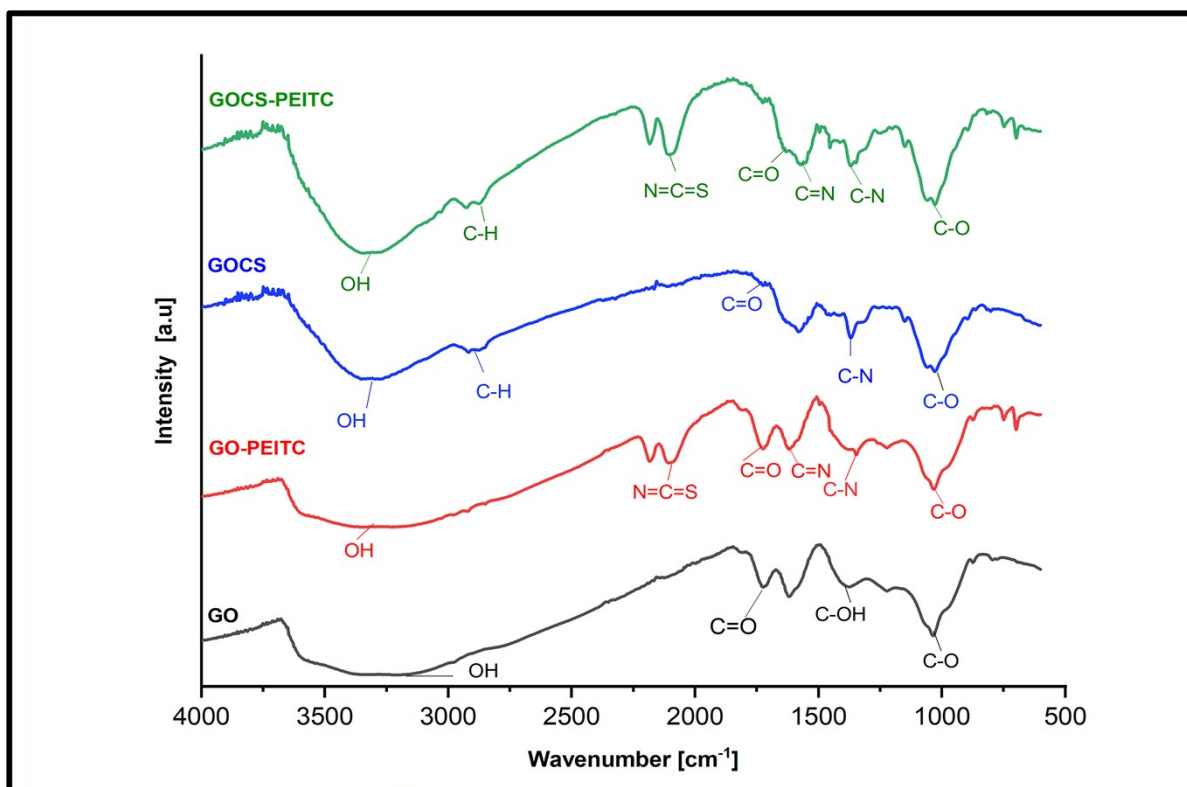

**Fig. S2** FTIR spectra of GO, GOCS and the nanocomposites GO-PEITC, GOCS and GOCS-PEITC nanocomposites.

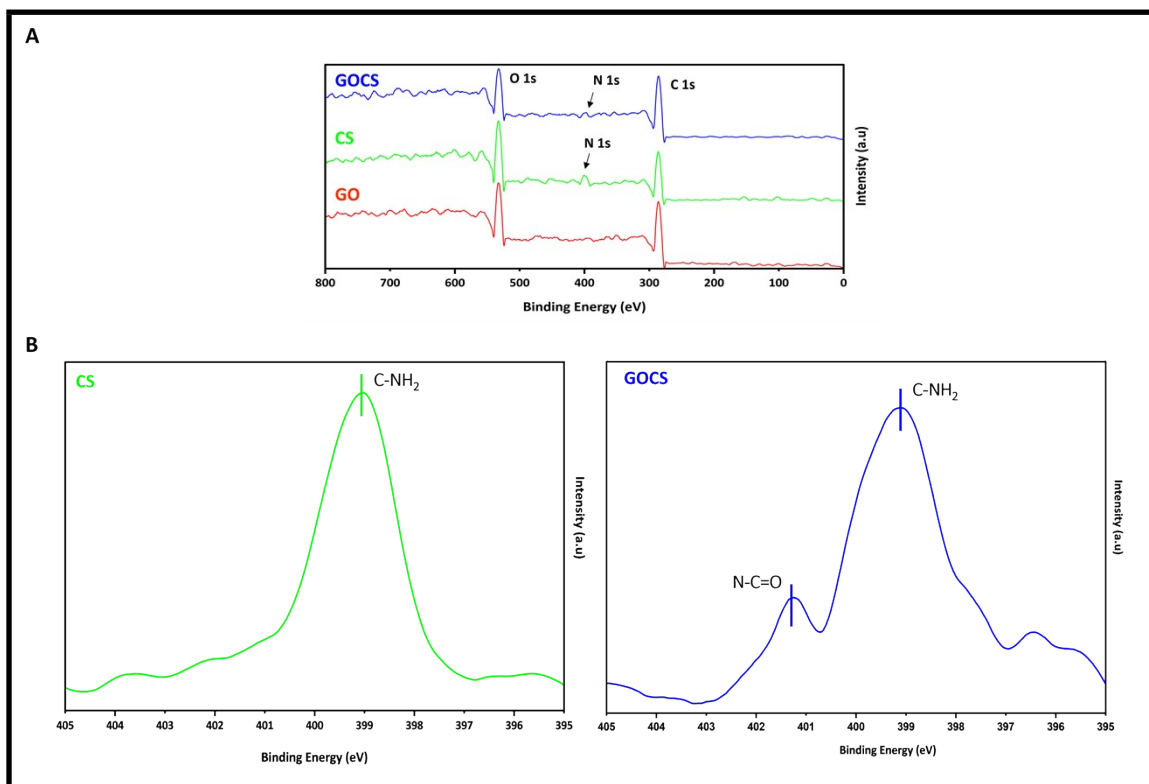

**Fig. S3.** (A) XPS survey spectra of GO, CS, and GOCS showing the C 1s, N 1s, and O 1s regions. (B) High-resolution N 1s spectra of CS and GOCS with assigned nitrogen-related regions, including C–NH<sub>2</sub> and amide N–C=O nitrogen species.

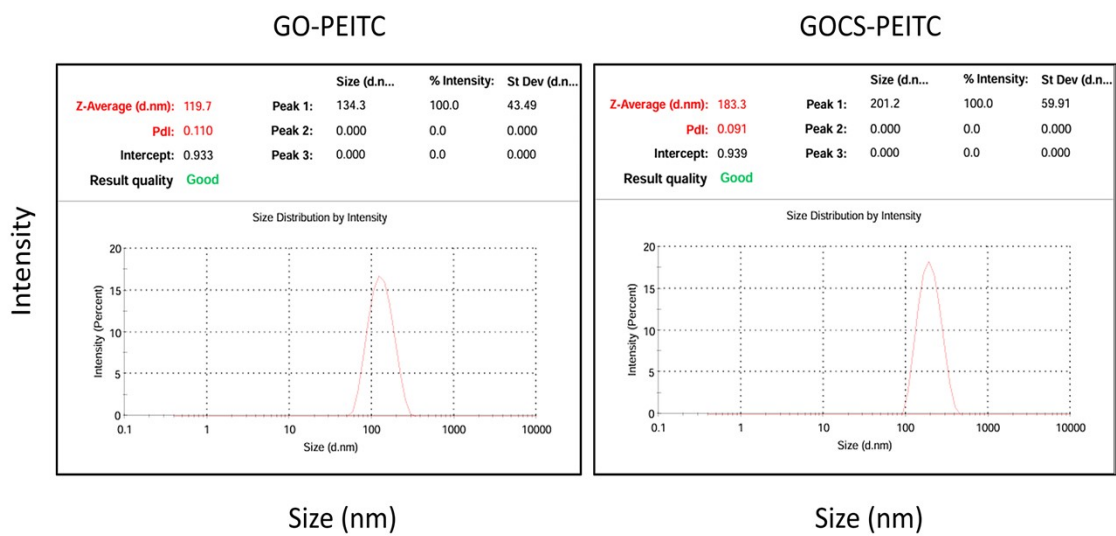

**Fig. S4.** Size distribution profiles of GO-PEITC and GOCS-PEITC nanocomposites measured by dynamic light scattering (DLS).

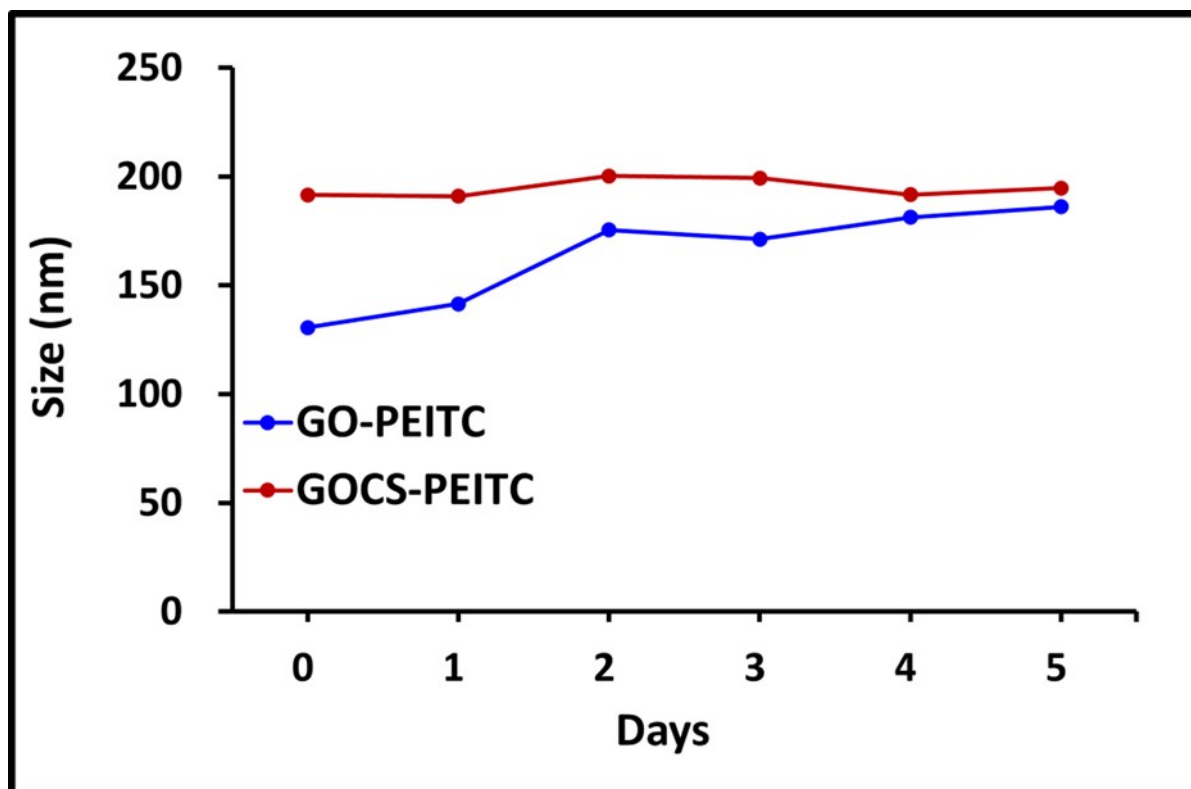

**Fig. S5.** Time-dependent stability of nanocomposites GO-PEITC and GOCS-PEITC in culture medium (DMEM+10%FBS).

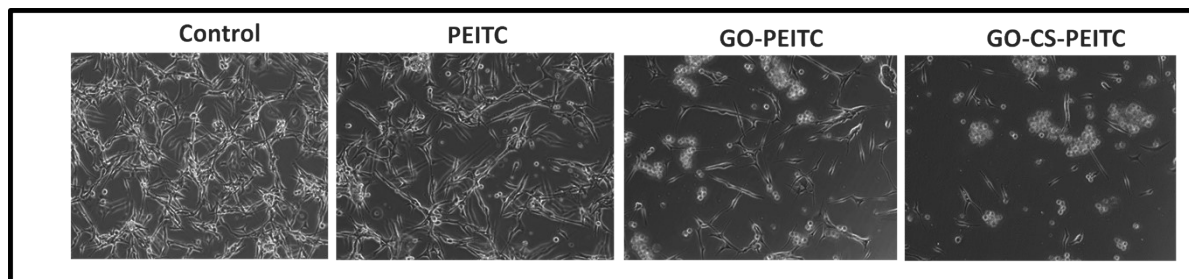

**Fig. S6** Representative bright-field microscopy images (20X) of cells treated with PEITC, GO-PEITC, and GOCS-PEITC nanocomposites

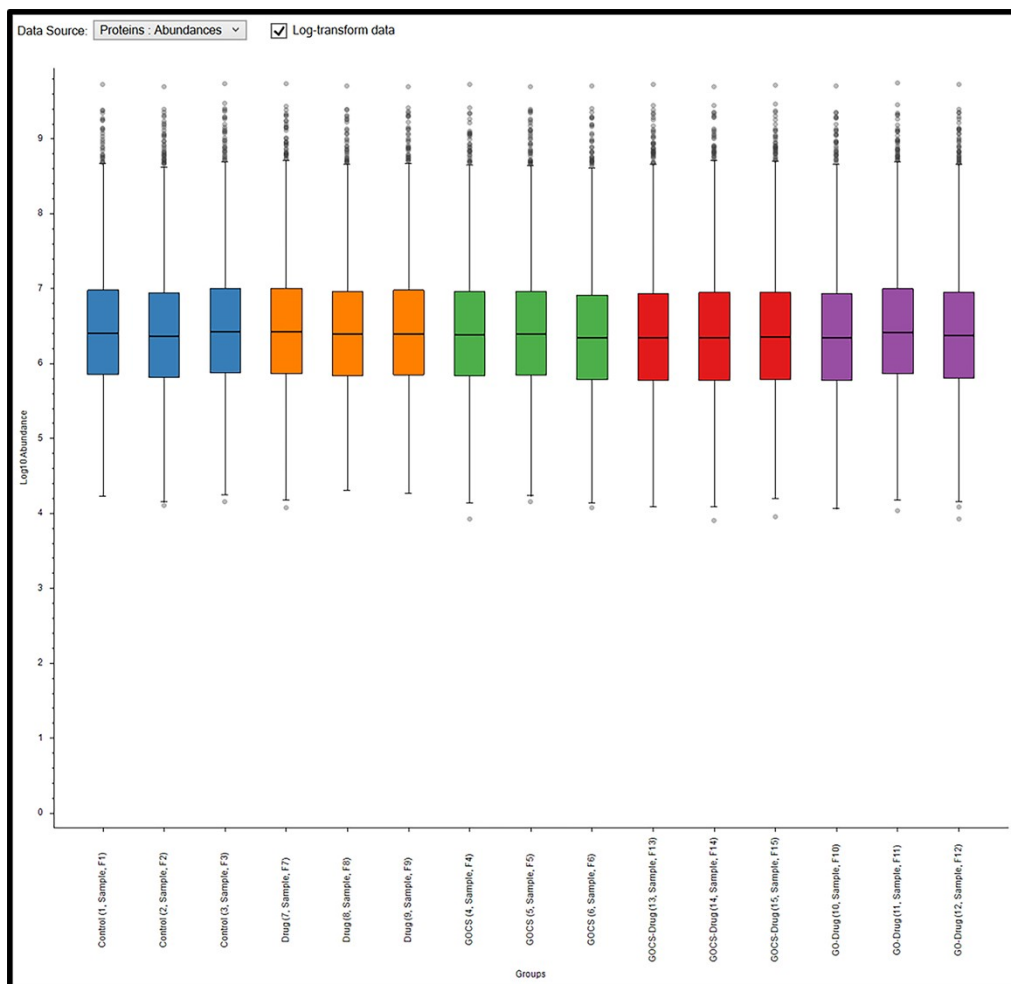

**Fig. S7** Box plot showing the distribution of log-transformed protein abundances across samples obtained by quantitative proteomics analysis.

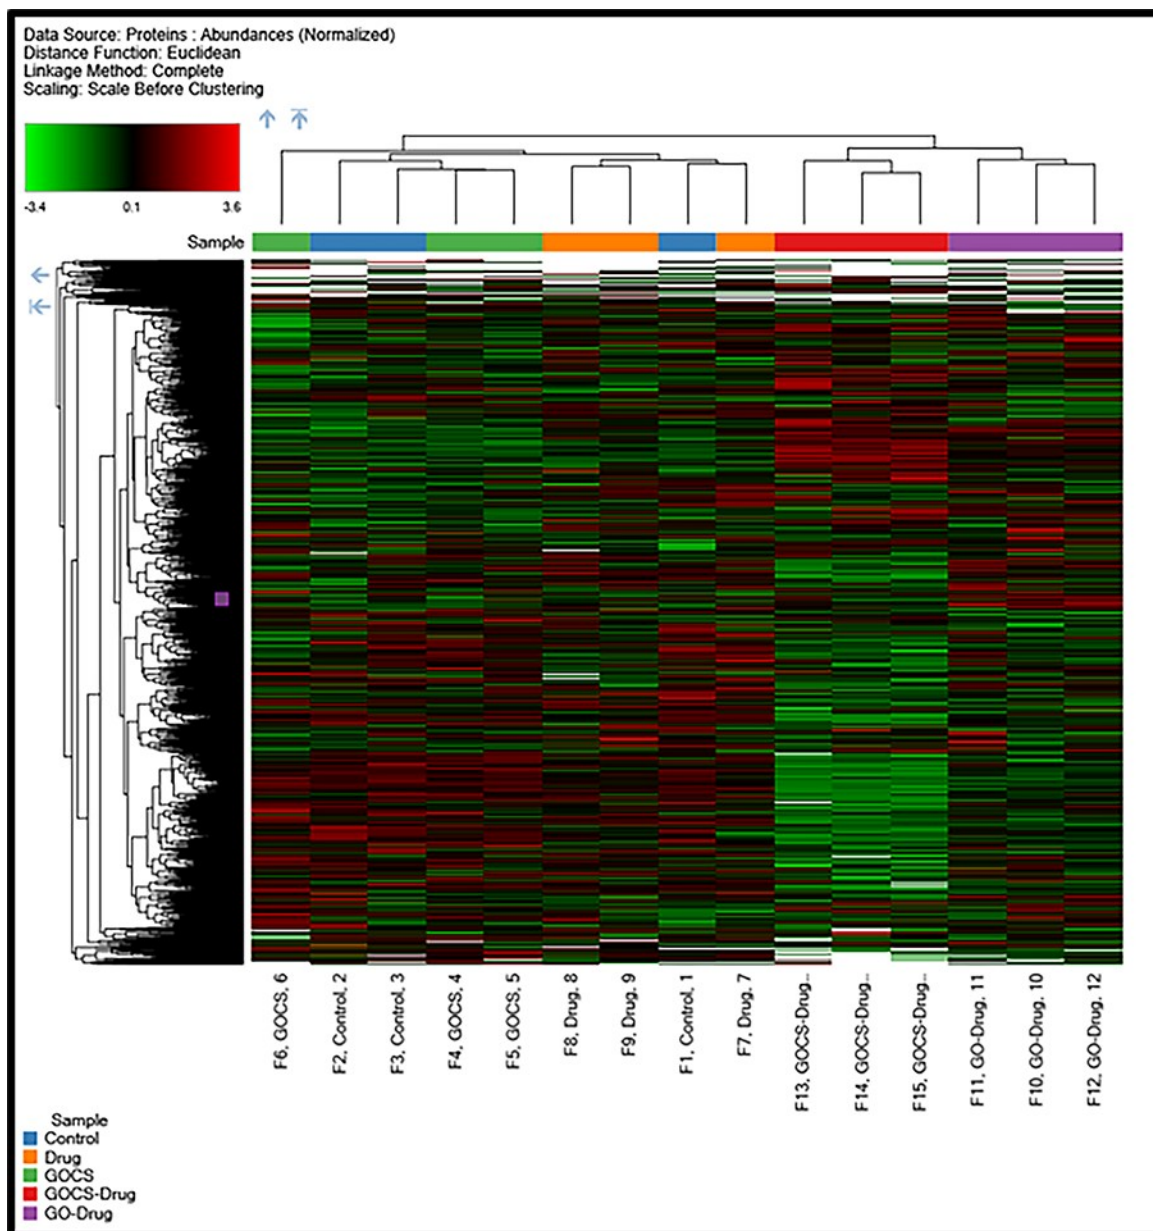

**Fig. S8** Heatmap of normalized protein abundances across different treatment groups from quantitative proteomics analysis. Rows represent proteins and columns represent biological samples. Colors indicate relative protein expression levels. Sample group labels are shown at the top.

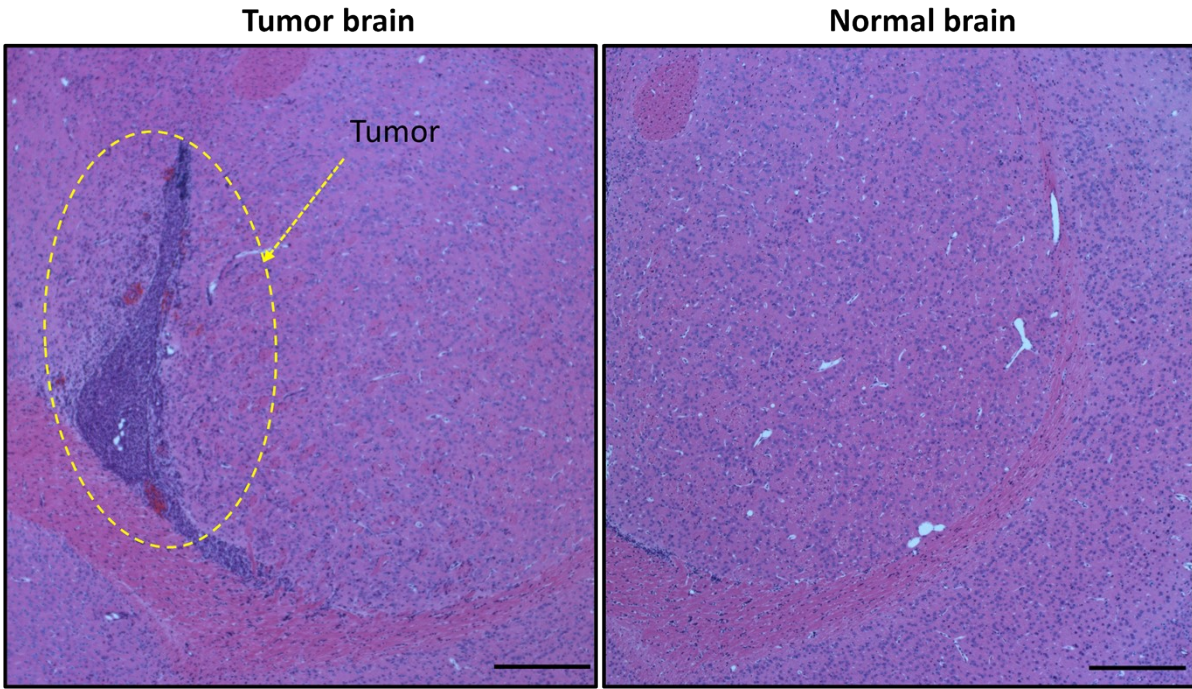

**Fig. S9** Representative H&E stained brain sections showing the tumor region and adjacent normal brain tissue 7 days after GOCS injection. Scale bar = 1000  $\mu\text{m}$ .
